# Supplementary material for: Life history responses of two ephemeral plant species to increased precipitation and nitrogen in the Gurbantunggut Desert
Source: PeerJ. 2019 Jan 11;7:e6158. doi: 10.7717/peerj.6158 (PMC6330950; doi:10.7717/peerj.6158)
Supplement: Data S1 [file peerj-07-6158-s001.xls]

## Sheet: Nepeta micrantha
	Number of leaves	Height(cm)	Root length(cm)	Leaf area(cm2)	Number of seeds	Root mass(g)	Stem mass(g)	Leaf mass(g)	Reproduction mass(g)	Total mass	Root percentage(%)	Stem percentage(%)	Leaf percentage(%)	Reproduction percentage(%)
CK	12	12	11.9	1.345	56	0.008	0.025	0.023	0.029	0.085	9.41176	29.4118	27.0588	34.1176
CK	10	10.7	8.8	1.0135	52	0.007	0.015	0.02	0.02	0.062	11.2903	24.1935	32.2581	32.2581
CK	16	13.5	11.1	1.5386	96	0.011	0.037	0.029	0.039	0.116	9.48276	31.8966	25	33.6207
CK	10	11.3	10.2	1.0419	28	0.007	0.019	0.019	0.014	0.059	11.8644	32.2034	32.2034	23.7288
CK	10	9	9.9	0.7328	24	0.005	0.012	0.012	0.015	0.044	11.3636	27.2727	27.2727	34.0909
CK	10	8.7	10.4	0.7371	28	0.004	0.014	0.013	0.016	0.047	8.51064	29.7872	27.6596	34.0426
CK	12	9.5	12.4	0.9622	28	0.004	0.019	0.016	0.013	0.052	7.69231	36.5385	30.7692	25
CK	10	9.5	10.2	0.7323	28	0.006	0.017	0.014	0.017	0.054	11.1111	31.4815	25.9259	31.4815
CK	12	19.2	0.8	0.9354	32	0.006	0.015	0.014	0.011	0.046	13.0435	32.6087	30.4348	23.913
CK	10	8.9	12.1	0.7407	20	0.006	0.012	0.019	0.013	0.05	12	24	38	26
W1	6	8.5	9.3	0.4865	32	0.008	0.01	0.006	0.011	0.035	22.8571	28.5714	17.1429	31.4286
W1	12	11.8	11.8	0.8611	52	0.006	0.022	0.015	0.018	0.061	9.83607	36.0656	24.5902	29.5082
W1	10	11.5	10	0.9107	58	0.009	0.02	0.015	0.029	0.073	12.3288	27.3973	20.5479	39.726
W1	10	9.5	9.9	0.4289	40	0.004	0.012	0.011	0.015	0.042	9.52381	28.5714	26.1905	35.7143
W1	12	9.1	15	0.7098	32	0.008	0.016	0.01	0.015	0.049	16.3265	32.6531	20.4082	30.6122
W1	12	9.6	8.9	0.6011	44	0.005	0.011	0.011	0.013	0.04	12.5	27.5	27.5	32.5
W1	8	9.2	8.3	0.3781	24	0.004	0.01	0.006	0.024	0.044	9.09091	22.7273	13.6364	54.5455
W1	8	7.6	7.9	0.3308	24	0.003	0.008	0.006	0.011	0.028	10.7143	28.5714	21.4286	39.2857
W1	10	8.5	9.5	0.4647	20	0.003	0.008	0.007	0.011	0.029	10.3448	27.5862	24.1379	37.931
W1	10	9.6	8.5	0.4384	32	0.006	0.012	0.013	0.008	0.039	15.3846	30.7692	33.3333	20.5128
W2	10	7.1	13.3	0.4665	28	0.031	0.009	0.008	0.008	0.056	55.3571	16.0714	14.2857	14.2857
W2	8	7.5	7.4	0.3474	36	0.004	0.006	0.006	0.009	0.025	16	24	24	36
W2	10	8.2	8.1	0.3963	36	0.003	0.008	0.006	0.011	0.028	10.7143	28.5714	21.4286	39.2857
W2	10	7.2	9	0.3791	24	0.003	0.008	0.006	0.01	0.027	11.1111	29.6296	22.2222	37.037
W2	8	6.5	6.4	0.5161	20	0.002	0.007	0.006	0.008	0.023	8.69565	30.4348	26.087	34.7826
W2	10	6.7	8.7	0.3426	24	0.001	0.004	0.004	0.008	0.017	5.88235	23.5294	23.5294	47.0588
W2	10	8.8	6.7	0.5025	36	0.004	0.009	0.007	0.016	0.036	11.1111	25	19.4444	44.4444
W2	10	7.3	6.2	0.4305	28	0.004	0.006	0.005	0.008	0.023	17.3913	26.087	21.7391	34.7826
W2	10	7.2	5.3	0.402	28	0.003	0.008	0.006	0.008	0.025	12	32	24	32
W2	10	7.2	8.4	0.4037	20	0.003	0.004	0.004	0.004	0.015	20	26.6667	26.6667	26.6667
W1N1	20	16	11.5	1.3312	56	0.017	0.056	0.043	0.035	0.151	11.2583	37.0861	28.4768	23.1788
W1N1	18	13	9.5	0.7655	40	0.016	0.034	0.048	0.012	0.11	14.5455	30.9091	43.6364	10.9091
W1N1	12	12.5	8.4	0.9129	60	0.011	0.027	0.021	0.028	0.087	12.6437	31.0345	24.1379	32.1839
W1N1	18	10	9.6	1.957	36	0.016	0.039	0.071	0.032	0.158	10.1266	24.6835	44.9367	20.2532
W1N1	22	17.8	11.2	1.7566	56	0.032	0.093	0.078	0.07	0.273	11.7216	34.0659	28.5714	25.641
W1N1	12	10.5	12.5	1.4699	76	0.019	0.031	0.043	0.022	0.115	16.5217	26.9565	37.3913	19.1304
W1N1	12	13	12	1.4576	88	0.013	0.029	0.03	0.033	0.105	12.381	27.619	28.5714	31.4286
W1N1	12	12.4	14.1	0.9687	76	0.012	0.027	0.032	0.028	0.099	12.1212	27.2727	32.3232	28.2828
W1N1	8	8.2	9.3	1.1865	24	0.007	0.015	0.02	0.005	0.047	14.8936	31.9149	42.5532	10.6383
W1N1	10	8	8.2	0.9241	24	0.008	0.018	0.016	0.007	0.049	16.3265	36.7347	32.6531	14.2857
W2N1	10	12.2	11.1	1.248	48	0.012	0.028	0.03	0.025	0.095	12.6316	29.4737	31.5789	26.3158
W2N1	12	11.6	7.9	1.2537	52	0.014	0.037	0.041	0.032	0.124	11.2903	29.8387	33.0645	25.8065
W2N1	10	10.4	11.4	1.1331	64	0.011	0.024	0.027	0.029	0.091	12.0879	26.3736	29.6703	31.8681
W2N1	10	10.3	9.7	0.8443	32	0.009	0.026	0.016	0.019	0.07	12.8571	37.1429	22.8571	27.1429
W2N1	10	13.2	7.3	0.6968	24	0.005	0.019	0.012	0.013	0.049	10.2041	38.7755	24.4898	26.5306
W2N1	12	14	8.5	0.9157	56	0.012	0.026	0.019	0.02	0.077	15.5844	33.7662	24.6753	25.974
W2N1	14	16.5	5.1	1.2892	64	0.017	0.028	0.044	0.026	0.115	14.7826	24.3478	38.2609	22.6087
W2N1	10	12	8.2	0.0827	24	0.007	0.016	0.015	0.011	0.049	14.2857	32.6531	30.6122	22.449
W2N1	10	9	8.8	1.0823	40	0.01	0.02	0.02	0.02	0.07	14.2857	28.5714	28.5714	28.5714
W2N1	10	9.5	7.2	0.9516	44	0.012	0.026	0.023	0.019	0.08	15	32.5	28.75	23.75
N1	10	7.8	9.9	0.5802	20	0.005	0.009	0.008	0.007	0.029	17.2414	31.0345	27.5862	24.1379
N1	12	14.8	10.1	1.0891	76	0.011	0.029	0.017	0.027	0.084	13.0952	34.5238	20.2381	32.1429
N1	12	11.7	7	0.7262	56	0.005	0.015	0.009	0.022	0.051	9.80392	29.4118	17.6471	43.1373
N1	12	12.7	8.3	0.5839	48	0.006	0.018	0.012	0.018	0.054	11.1111	33.3333	22.2222	33.3333
N1	8	9.2	9.4	0.5786	36	0.005	0.011	0.012	0.014	0.042	11.9048	26.1905	28.5714	33.3333
N1	8	9.2	9.4	0.6748	20	0.004	0.012	0.012	0.008	0.036	11.1111	33.3333	33.3333	22.2222
N1	10	12.4	10.2	0.7823	96	0.01	0.018	0.017	0.028	0.073	13.6986	24.6575	23.2877	38.3562
N1	10	9	7.9	0.5376	44	0.005	0.01	0.008	0.019	0.042	11.9048	23.8095	19.0476	45.2381
N1	8	6.8	7	0.4799	36	0.006	0.007	0.008	0.011	0.032	18.75	21.875	25	34.375
N1	8	6.7	8.4	0.2632	12	0.004	0.01	0.005	0.007	0.026	15.3846	38.4615	19.2308	26.9231
N2	14	12	9.7	1.3329	76	0.014	0.031	0.033	0.032	0.11	12.7273	28.1818	30	29.0909
N2	20	10.5	7.8	1.1995	60	0.012	0.03	0.066	0.022	0.13	9.23077	23.0769	50.7692	16.9231
N2	14	12.3	10.7	1.3604	56	0.009	0.032	0.038	0.026	0.105	8.57143	30.4762	36.1905	24.7619
N2	12	8.1	11.4	1.0048	40	0.009	0.01	0.02	0.019	0.058	15.5172	17.2414	34.4828	32.7586
N2	16	9.8	7.7	1.2363	16	0.015	0.027	0.052	0.005	0.099	15.1515	27.2727	52.5253	5.05051
N2	8	10.5	10.6	1.2018	48	0.012	0.022	0.02	0.019	0.073	16.4384	30.137	27.3973	26.0274
N2	8	7.3	8.6	0.528	16	0.006	0.008	0.011	0.007	0.032	18.75	25	34.375	21.875
N2	14	12.5	11.5	1.0227	72	0.022	0.05	0.048	0.04	0.16	13.75	31.25	30	25
N2	8	7.2	6.4	0.774	32	0.007	0.009	0.012	0.012	0.04	17.5	22.5	30	30
N2	12	6.4	9.1	1.0307	20	0.008	0.018	0.03	0.013	0.069	11.5942	26.087	43.4783	18.8406

## Sheet: Eremopyrum distans
	Height(cm)	Root length(cm)	Number of leaves	Leaf area(cm2)	Number of fruits	Root mass(g)	Stem mass(g)	Leaf mass(g)	Reproduction mass(g)	Total mass(g)	Root percentage(%)	Stem percentage(%)	Leaf percentage(%)	Reproduction percentage(%)
CK	9.3	11.7	12	3.6589	56	0.006	0.031	0.021	0.047	0.105	5.71429	29.5238	20	44.7619
CK	13.7	9.1	10	5.0895	56	0.008	0.06	0.031	0.083	0.182	4.3956	32.967	17.033	45.6044
CK	14.5	8.5	12	7.4504	80	0.007	0.067	0.046	0.11	0.23	3.04348	29.1304	20	47.8261
CK	9.2	8.6	11	3.8933	46	0.004	0.042	0.025	0.034	0.105	3.80952	40	23.8095	32.381
CK	11	7.9	10	4.3671	40	0.005	0.037	0.027	0.055	0.124	4.03226	29.8387	21.7742	44.3548
CK	9.5	8.5	8	2.6739	44	0.003	0.029	0.019	0.044	0.095	3.15789	30.5263	20	46.3158
CK	14.9	6.9	14	7.307	102	0.005	0.07	0.044	0.112	0.231	2.1645	30.303	19.0476	48.4848
CK	11.1	6.9	12	5.8666	80	0.01	0.048	0.034	0.065	0.157	6.36943	30.5732	21.6561	41.4013
CK	11.2	8.1	10	3.7109	52	0.004	0.028	0.02	0.038	0.09	4.44444	31.1111	22.2222	42.2222
CK	10.3	7.8	10	4.2114	42	0.009	0.034	0.029	0.04	0.112	8.03571	30.3571	25.8929	35.7143
W1	11.8	9.8	31	15.1632	168	0.018	0.112	0.085	0.158	0.373	4.82574	30.0268	22.7882	42.3592
W1	12.4	10.8	42	22.3091	380	0.048	0.195	0.131	0.335	0.709	6.7701	27.5035	18.4767	47.2496
W1	12.5	10.7	23	12.744	174	0.017	0.109	0.07	0.163	0.359	4.73538	30.3621	19.4986	45.4039
W1	14.8	10.2	18	8.2062	182	0.011	0.101	0.046	0.18	0.338	3.25444	29.8817	13.6095	53.2544
W1	15.9	9.3	19	14.2204	316	0.018	0.165	0	0.23	0.413	4.35835	39.9516	0	55.6901
W1	11.8	8.2	12	5.2204	98	0.005	0.046	0.08	0.068	0.199	2.51256	23.1156	40.201	34.1709
W1	12.4	5.1	14	6.5108	88	0.003	0.052	0.033	0.061	0.149	2.01342	34.8993	22.1477	40.9396
W1	12	9.8	16	7.8723	90	0.013	0.083	0.047	0.081	0.224	5.80357	37.0536	20.9821	36.1607
W1	12.5	9.5	13	5.6981	95	0.006	0.046	0.031	0.051	0.134	4.47761	34.3284	23.1343	38.0597
W1	10.9	8.1	14	6.2912	126	0.011	0.058	0.038	0.88	0.987	1.11449	5.87639	3.85005	89.1591
W2	14.1	8.9	22	8.32	216	0.015	0.134	0.043	0.169	0.361	4.15512	37.1191	11.9114	46.8144
W2	18.6	9.2	10	4.232	150	0.017	0.098	0.027	0.203	0.345	4.92754	28.4058	7.82609	58.8406
W2	18	8.2	13	7.6817	170	0.009	0.087	0.031	0.112	0.239	3.76569	36.4017	12.9707	46.8619
W2	19.5	6.5	16	10.2984	186	0.015	0.133	0.055	0.195	0.398	3.76884	33.4171	13.8191	48.995
W2	20.1	6.6	17	6.7227	148	0.005	0.096	0.036	0.16	0.297	1.6835	32.3232	12.1212	53.8721
W2	19.2	5.6	9	5.5443	116	0.004	0.072	0.027	0.145	0.248	1.6129	29.0323	10.8871	58.4677
W2	16.8	5.7	10	8.1357	152	0.01	0.113	0.047	0.147	0.317	3.15457	35.6467	14.8265	46.3722
W2	18	7.9	15	5.567	122	0.008	0.084	0.029	0.157	0.278	2.8777	30.2158	10.4317	56.4748
W2	19.5	7.2	10	15.146	256	0.021	0.199	0.053	0.303	0.576	3.64583	34.5486	9.20139	52.6042
W2	19.2	8.8	24	6.0474	106	0.01	0.08	0.026	0.139	0.255	3.92157	31.3725	10.1961	54.5098
W1N1	14.1	15.1	56	34.0609	771	0.063	0.386	0.172	0.611	1.232	5.11364	31.3312	13.961	49.5942
W1N1	18	8.5	26	21.2259	417	0.034	0.259	0.127	0.434	0.854	3.98126	30.3279	14.8712	50.8197
W1N1	17.5	10.5	23	14.3563	360	0.033	0.216	0.079	0.324	0.652	5.06135	33.1288	12.1166	49.6933
W1N1	14.2	9.5	18	14.4165	204	0.023	0.107	0.067	0.152	0.349	6.59026	30.659	19.1977	43.553
W1N1	15.9	8.1	14	10.4809	177	0.026	0.116	0.057	0.159	0.358	7.26257	32.4022	15.9218	44.4134
W1N1	15.8	7.2	12	5.0487	123	0.007	0.062	0.026	0.104	0.199	3.51759	31.1558	13.0653	52.2613
W1N1	15.5	7.5	12	5.3398	90	0.003	0.052	0.025	0.067	0.147	2.04082	35.3741	17.0068	45.5782
W1N1	14.5	10.5	31	20.6497	468	0.042	0.23	0.093	0.299	0.664	6.3253	34.6386	14.006	45.0301
W1N1	12.2	8.8	15	7.3222	117	0.007	0.068	0.032	0.085	0.192	3.64583	35.4167	16.6667	44.2708
W1N1	11.7	8.5	17	5.6252	126	0.007	0.057	0.023	0.093	0.18	3.88889	31.6667	12.7778	51.6667
W2N1	13.7	10.3	19	11.1257	198	0.009	0.161	0.049	0.252	0.471	1.91083	34.1826	10.4034	53.5032
W2N1	19.2	8.3	17	9.2445	96	0.007	0.126	0.041	0.1	0.274	2.55474	45.9854	14.9635	36.4964
W2N1	18.5	6.7	22	15.1807	198	0.02	0.215	0.167	0.294	0.696	2.87356	30.8908	23.9943	42.2414
W2N1	15.7	9.9	31	19.339	255	0.029	0.231	0.097	0.259	0.616	4.70779	37.5	15.7468	42.0455
W2N1	19.9	5	21	15.0505	150	0.013	0.151	0.071	0.112	0.347	3.7464	43.5159	20.4611	32.2767
W2N1	19.1	6.9	25	15.6635	189	0.017	0.185	0.064	0.174	0.44	3.86364	42.0455	14.5455	39.5455
W2N1	16.7	8.3	26	16.4628	168	0.014	0.172	0.057	0.146	0.389	3.59897	44.2159	14.653	37.5321
W2N1	16.5	6.5	19	11.4951	170	0.015	0.162	0.05	0.158	0.385	3.8961	42.0779	12.987	41.039
W2N1	18	8.7	13	7.932	108	0.01	0.088	0.029	0.099	0.226	4.42478	38.9381	12.8319	43.8053
W2N1	13.7	6.9	12	5.197	60	0.005	0.056	0.02	0.035	0.116	4.31034	48.2759	17.2414	30.1724
N1	13.5	9.2	11	5.2758	84	0.006	0.048	0.031	0.058	0.143	4.1958	33.5664	21.6783	40.5594
N1	13.6	8.6	15	5.5897	149	0.01	0.062	0.031	0.122	0.225	4.44444	27.5556	13.7778	54.2222
N1	13.2	10.8	13	2.2359	111	0.035	0.062	0.013	0.092	0.202	17.3267	30.6931	6.43564	45.5446
N1	12.9	9	25	11.101	195	0.015	0.13	0.06	0.146	0.351	4.2735	37.037	17.094	41.5954
N1	13.5	10.3	11	4.8615	72	0.006	0.05	0.027	0.048	0.131	4.58015	38.1679	20.6107	36.6412
N1	15.6	11.4	29	11.6694	288	0.018	0.133	0.052	0.227	0.43	4.18605	30.9302	12.093	52.7907
N1	12.5	8.5	12	3.2357	64	0.007	0.04	0.015	0.061	0.123	5.69106	32.5203	12.1951	49.5935
N1	11.5	7.5	15	6.8209	156	0.012	0.079	0.035	0.124	0.25	4.8	31.6	14	49.6
N1	14	9.5	18	7.3453	93	0.01	0.088	0.038	0.079	0.215	4.65116	40.9302	17.6744	36.7442
N1	16.4	7.1	20	11.1024	159	0.015	0.117	0.05	0.142	0.324	4.62963	36.1111	15.4321	43.8272
N2	15.4	9.1	16	8.1236	98	0.016	0.073	0.039	0.077	0.205	7.80488	35.6098	19.0244	37.561
N2	13.8	9.1	15	9.5044	138	0.017	0.098	0.046	0.144	0.305	5.57377	32.1311	15.082	47.2131
N2	15.1	7.9	16	7.9457	121	0.025	0.092	0.039	0.136	0.292	8.56164	31.5068	13.3562	46.5753
N2	15.9	10.3	12	5.8078	114	0.017	0.06	0.026	0.097	0.2	8.5	30	13	48.5
N2	16	9.4	13	6.2621	105	0.007	0.071	0.027	0.111	0.216	3.24074	32.8704	12.5	51.3889
N2	17.5	7.9	10	5.523	51	0.009	0.055	0.024	0.06	0.148	6.08108	37.1622	16.2162	40.5405
N2	17.7	8.8	13	4.0227	111	0.009	0.058	0.022	0.129	0.218	4.12844	26.6055	10.0917	59.1743
N2	15.6	10.8	18	10.7951	96	0.01	0.142	0.048	0.085	0.285	3.50877	49.8246	16.8421	29.8246
N2	14.9	8.7	18	8.4959	156	0.019	0.087	0.038	0.14	0.284	6.69014	30.6338	13.3803	49.2958
N2	14.6	10.4	17	12.0257	198	0.031	0.115	0.064	0.19	0.4	7.75	28.75	16	47.5

## Sheet: Data(Figure 1)
Date	Precipitation(cm)	Tenperature(℃)	Soil water content(%)
2016-09-21	0	22.95	1.82
2016-09-22	0	22.9	1.74
2016-09-23	0	18.92	1.77
2016-09-24	0	16.8	1.67
2016-09-25	0	13.24	1.7
2016-09-26	0	15.72	1.59
2016-09-27	0	15.08	1.59
2016-09-28	0	14.49	1.67
2016-09-29	0	15.62	1.65
2016-09-30	0	14.97	1.7
2016-10-01	0	16.92	1.65
2016-10-02	6.5	13.84	1.71
2016-10-03	10.5	10.91	1.81
2016-10-04	0	10.47	8.45
2016-10-05	5	7.54	7.49
2016-10-06	0	6.45	7.64
2016-10-07	0	6.76	7.65
2016-10-08	0	7.31	7.1
2016-10-09	0	6.39	6.69
2016-10-10	0	5.33	6.41
2016-10-11	0	7.72	6.14
2016-10-12	0	7.69	5.97
2016-10-13	0	8.6	5.84
2016-10-14	0	7.53	5.72
2016-10-15	0	4.98	5.54
2016-10-16	0	1.86	5.43
2016-10-17	0	5.82	5.29
2016-10-18	0	8.61	5.14
2016-10-19	3.5	4.98	5.19
2016-10-20	0	1.37	5.34
2016-10-21	0	1.63	6.09
2016-10-22	0	3.51	5.75
2016-10-23	0	5.06	5.55
2016-10-24	0	3.46	5.47
2016-10-25	0	1.08	5.37
2016-10-26	0	-2.81	5.19
2016-10-27	0	-1.93	4.93
2016-10-28	0	-1.65	4.64
2016-10-29	0	-3.66	4.78
2016-10-30	0	-3.39	4.73
2016-10-31	0	0.47	4.05
2016-11-01	0	-1.6	4.71
2016-11-02	0	-1.68	4.3
2016-11-03	0	1.77	4.3
2016-11-04	11.5	3.2	4.35
2016-11-05	0	3.19	5.03
2016-11-06	0	-0.07	8.33
2016-11-07	0	-2.48	7.21
2016-11-08	0	-1.8	6.47
2016-11-09	2.5	-1.58	5.72
2016-11-10	0.5	-4.41	7.65
2016-11-11	2.5	-0.04	7.17
2016-11-12	0	3.24	7.21
2016-11-13	0	-0.37	7.5
2016-11-14	0	-1.54	7.33
2016-11-15	0	0.21	6.92
2016-11-16	0	-1.82	6.59
2016-11-17	0	-5.57	6.57
2016-11-18	0	-8.33	6.43
2016-11-19	0	-13.41	4.49
2016-11-20	0	-12.36	3.64
2016-11-21	0	-15.49	3.42
2016-11-22	0	-18.32	3.18
2016-11-23	0	-17.94	2.99
2016-11-24	0	-19.02	2.89
2016-11-25	0	-12.52	2.78
2016-11-26	0	-17	2.6
2016-11-27	0	-11.57	2.67
2016-11-28	0	-10.6	2.6
2016-11-29	0	-14.13	2.73
2016-11-30	0	-14.22	2.78
2016-12-01	0	-14.72	2.82
2016-12-02	0	-16.43	2.87
2016-12-03	0	-14.3	2.85
2016-12-04	0	-10.18	2.78
2016-12-05	1	-4.35	2.7
2016-12-06	0.5	-4.04	2.8
2016-12-07	0	-2.96	2.91
2016-12-08	0	-2.93	3.05
2016-12-09	0	-4.1	3.15
2016-12-10	0	-3.27	3.14
2016-12-11	0	-2.6	3.2
2016-12-12	0	-3.29	3.28
2016-12-13	0	-2.89	3.31
2016-12-14	0	-2.2	3.32
2016-12-15	0	-3.84	3.35
2016-12-16	0	-3.49	3.35
2016-12-17	0	-4.08	3.31
2016-12-18	0	-6.19	3.28
2016-12-19	0	-4.87	3.17
2016-12-20	0	-7.43	3.14
2016-12-21	0	-8.55	3.26
2016-12-22	0	-9.7	3.29
2016-12-23	0	-10.73	3.28
2016-12-24	0	-8.57	3.22
2016-12-25	0	-16.62	3.19
2016-12-26	0	-18.81	3.38
2016-12-27	0	-22.02	3.24
2016-12-28	0	-19.64	3.1
2016-12-29	0	-21.82	3.26
2016-12-30	0	-18.53	2.4
2016-12-31	0	-10.08	1.33
2017-01-01	0	-12.41	2.94
2017-01-02	0	-15.81	3.05
2017-01-03	0	-18.32	3.1
2017-01-04	0	-17.69	3.18
2017-01-05	0	-21.11	3.1
2017-01-06	0	-13.91	3.19
2017-01-07	0	-15.25	2.97
2017-01-08	0	-18.51	3.05
2017-01-09	0	-22.32	3.11
2017-01-10	0	-22.06	3.2
2017-01-11	0	-22.45	3.13
2017-01-12	0	-22.85	3.18
2017-01-13	0	-23.24	3.26
2017-01-14	0	-20.86	3.09
2017-01-15	0	-21.63	2.98
2017-01-16	0	-23.52	3.11
2017-01-17	0	-24.48	3.28
2017-01-18	0	-24.19	3.18
2017-01-19	0	-21.44	3.07
2017-01-20	0	-23.47	2.89
2017-01-21	0	-22.21	3.22
2017-01-22	0	-23.47	3.13
2017-01-23	0	-13.61	2.99
2017-01-24	0	-13.17
2017-01-25	0	-17.62	2.71
2017-01-26	0	-17.11	2.89
2017-01-27	0	-19.79	2.88
2017-01-28	0	-19.88	2.98
2017-01-29	0	-23.26	3
2017-01-30	0	-21.88	3.1
2017-01-31	0	-17.33	3.03
2017-02-01	0	-14.97	2.84
2017-02-02	0	-19.05	2.8
2017-02-03	0	-13.78	2.96
2017-02-04	0	-8.66	2.8
2017-02-05	0	-13.18	2.69
2017-02-06	0	-22.37	2.94
2017-02-07	0	-21.92	3.26
2017-02-08	0	-20.98	3.13
2017-02-09	0	-20.98	3.05
2017-02-10	0	-19.92	2.99
2017-02-11	0	-16.3	2.94
2017-02-12	0	-17.26	2.85
2017-02-13	0	-14.38	2.88
2017-02-14	0	-9.8	2.8
2017-02-15	0	-13.43	2.72
2017-02-16	0	-9.61	2.88
2017-02-17	0.5	-11.58	2.8
2017-02-18	0	-8.89	2.86
2017-02-19	1	-7.3	2.81
2017-02-20	0	-15.88	2.84
2017-02-21	0	-19.55	3.11
2017-02-22	0	-17.54	3.2
2017-02-23	0	-17.87	3.12
2017-02-24	0	-19.74	3.13
2017-02-25	0	-15.81	3.2
2017-02-26	0.5	-14.33	3.06
2017-02-27	0	-13.48	3.02
2017-02-28	0	-11.01	3.02
2017-03-01	0	-13.51	2.96
2017-03-02	0	-11.89	3
2017-03-03	1.5	-9.91	2.98
2017-03-04	0.5	-9.48	2.94
2017-03-05	1.5	-8.09	2.97
2017-03-06	0.5	-12.07	2.95
2017-03-07	0	-6.56	3.06
2017-03-08	0.5	-6.09	2.95
2017-03-09	0	-8.16	3
2017-03-10	0.5	-8.54	3.08
2017-03-11	0	-7.66	3.09
2017-03-12	0	-7.06	3.1
2017-03-13	0	-6.9	3.11
2017-03-14	0	-4.67	3.12
2017-03-15	0	-7.11	3.13
2017-03-16	0	-4.98	2.29
2017-03-17	0	-4.48	3.2
2017-03-18	0	-6.09	3.25
2017-03-19	0	-2.74	3.27
2017-03-20	5	-4.48	3.39
2017-03-21	1	-7.05	3.5
2017-03-22	0	-4.64	3.58
2017-03-23	0	-5.28	3.63
2017-03-24	0	-4.42	5.36
2017-03-25	0	-1.67	9.58
2017-03-26	1.5	0.76	10.62
2017-03-27	0.5	1.89	10.01
2017-03-28	0	6.58	10.68
2017-03-29	0	9.31	10.75
2017-03-30	0	10.63	10.06
2017-03-31	0	6.74	10.18
2017-04-01	0	10.47	9.82
2017-04-02	0	10.15	9.38
2017-04-03	6	3.38	9.1
2017-04-04	0.5	4.74	9.56
2017-04-05	0	5.16	9.38
2017-04-06	0	5.85	9.15
2017-04-07	0	7.77	8.9
2017-04-08	0	9.1	8.75
2017-04-09	0	8.25	8.55
2017-04-10	0	8.3	8.42
2017-04-11	0	11.66	8.32
2017-04-12	0	15.46	8.07
2017-04-13	11	11.26	7.95
2017-04-14	0	11.96	8.91
2017-04-15	0	13.61	9.32
2017-04-16	5.5	12.45	8.62
2017-04-17	0.5	12.5	8.73
2017-04-18	0	11.79	9.38
2017-04-19	0	12.86	9.57
2017-04-20	0	14.56	9.58
2017-04-21	0	16.35	8.88
2017-04-22	0.5	16.75	8.48
2017-04-23	0	17.27	8.16
2017-04-24	0	16.69	8
2017-04-25	0.5	14.07	7.75
2017-04-26	0	14.65	7.54
2017-04-27	0	15.37	7.37
2017-04-28	0	15.83	7.29
2017-04-29	5.5	13.42	7.07
2017-04-30	5.5	12.54	6.62
2017-05-01	1	8.4	9.58
2017-05-02	0.5	11.13	8.57
2017-05-03	0	13.57	8.17
2017-05-04	0.5	13.59	7.76
2017-05-05	0	17.87	8.28
2017-05-06	2	18.32	8.42
2017-05-07	1	18.12	7.75
2017-05-08	0	15.82	7.97
2017-05-09	0	17.95	7.51
2017-05-10	0	21.03	7.25
2017-05-11	0.5	22.44	6.74
2017-05-12	0	20.91	6.1
2017-05-13	0	21.13	5.62
2017-05-14	0	24.73	4.83
2017-05-15	0	23.75	4.02
2017-05-16	0	22.5	3.69
2017-05-17	0	20.99	3.36
2017-05-18	2	13.4	3.22
2017-05-19	0	14.23	4.83
2017-05-20	0	16.54	7.29
2017-05-21	0	18.17	6.92
2017-05-22	0	19.3	6.23
2017-05-23	0	23.25	5.33
2017-05-24	0	25.51	4.41
2017-05-25	0	26.6	3.77
2017-05-26	2.5	18.38	3.35
2017-05-27	0	18.94	3.32
2017-05-28	1	21.24	4.09
2017-05-29	2.5	24.19	4.16
2017-05-30	0	21.8	3.89
2017-05-31	15.5	20.93	3.41
2017-06-01	0	21.22	3.03
